# Supplementary material
Source: Springer Nature journal article supplement (https://www.springermedizin.de/resource/supplementary/12960_2004_28_MOESM2_ESM.pdf/9570244)
Supplement: MOESM2 [file 9570244]

## CENTRAL LEVEL: MINISTRY OF HEALTH

Minister for Public Health

Secretary-General of Public Health

- 1<sup>st</sup> Department: General services and personnel
- 2<sup>nd</sup> Department: Hospital
- 3<sup>rd</sup> Department: Pharmacies and laboratories
- 4<sup>th</sup> Department: Epidemiology, great endemics, preventive medicine, hygiene and sanitation
- 5<sup>th</sup> Department: Primary health care
- 6<sup>th</sup> Department: Teaching of health sciences and advanced training for teachers

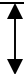

## INTERMEDIARY LEVEL: PROVINCE AND DISTRICT

1. 1st Office
2. 2nd Office
3. 3rd Office
4. 4th Office
5. 5th Office
6. 6th Office

N.B.: These are intermediate guarantors of central departments

- ✓ Offices are replaced by cells at district level.



## PERIPHERAL LEVEL: HEALTH ZONE

1. BCZ (Central Office of the Health Zone / District)
2. HGR (General Reference Hospital)
3. CS/PS (Health Center / Health Post)
4. COMMUNITY
